# Supplementary material for: Structures and trends of neutral MXxsolvent4−xtetrahedra and anionic [MX4]2−tetrahalometallates of zinc(ii), cadmium(ii) and mercury(ii) with benzopyridine- and benzopyrazine-type N-donor ligands or cations
Source: Royal Society of Chemistry journal article supplement (doi:10.1039/c6ce00568c), 2016-01-01

## Supplementary Material

### Experimental and Simulated Powder Patterns

Comparison of the experimental X-ray powder patterns of the bulk samples with powder patterns calculated from the single crystal structures reported, to determine if the single crystal selected for single crystal X-ray diffraction is representative of the bulk sample, was carried out. The experimental powder patterns are shown in red, while the calculated patterns are given in black.

Compounds **5** and **14** decomposed upon preparative grinding of powder X-ray diffraction samples. For all other compounds the single crystal was found to be representative of the bulk sample.

#### Compound 1: [phe-H]<sub>2</sub>[HgCl<sub>4</sub>]·2H<sub>2</sub>O

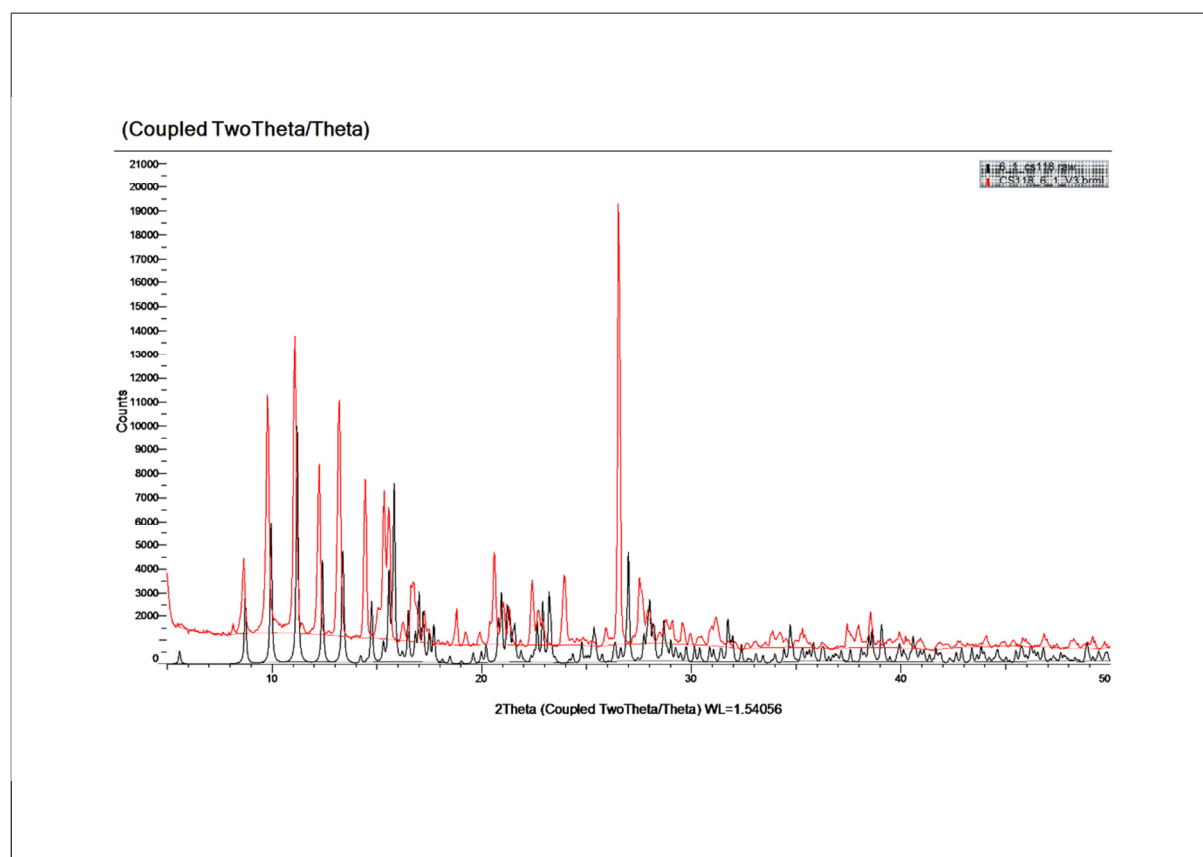

**Compound 2: [phe-H]<sub>2</sub>[HgBr<sub>4</sub>]<sub>2</sub>·2H<sub>2</sub>O**

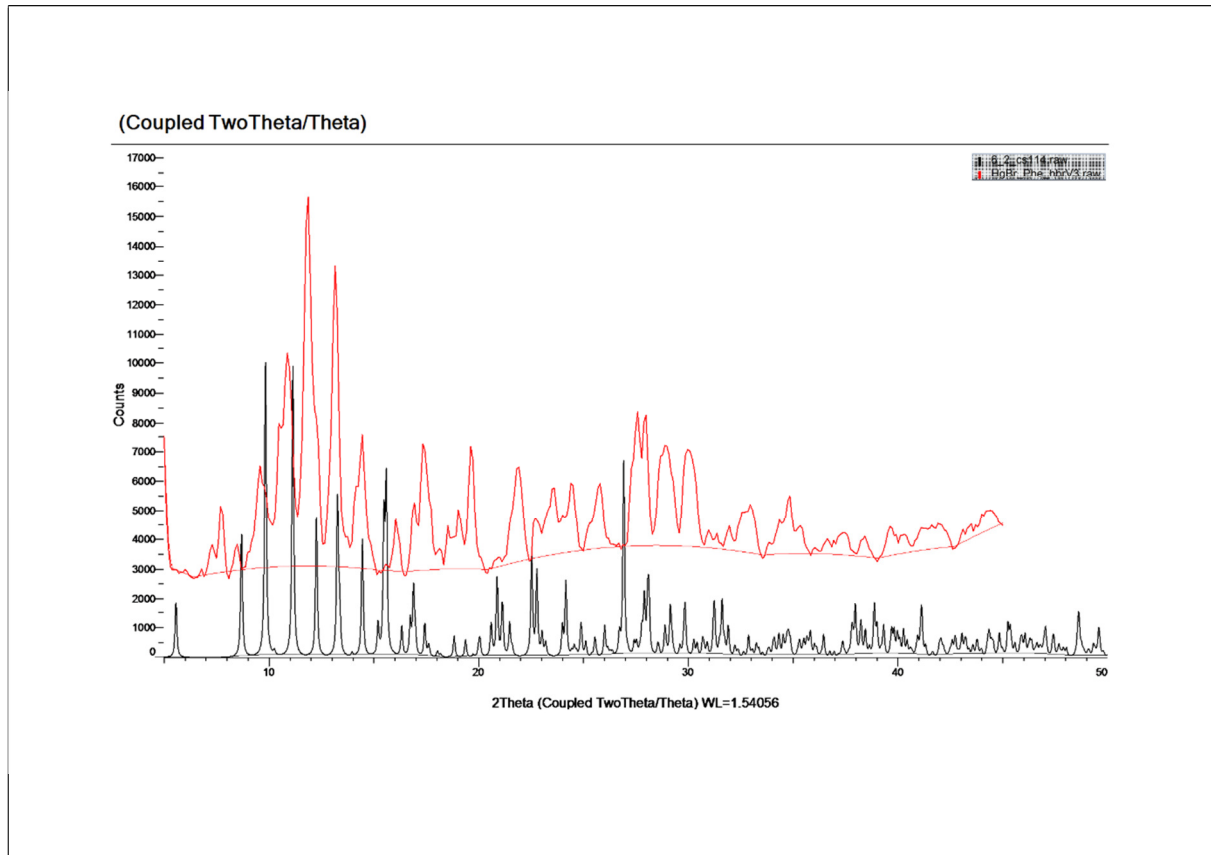

**Compound 3: [phe-H]<sub>2</sub>[CdBr<sub>4</sub>]<sub>2</sub>·2H<sub>2</sub>O**

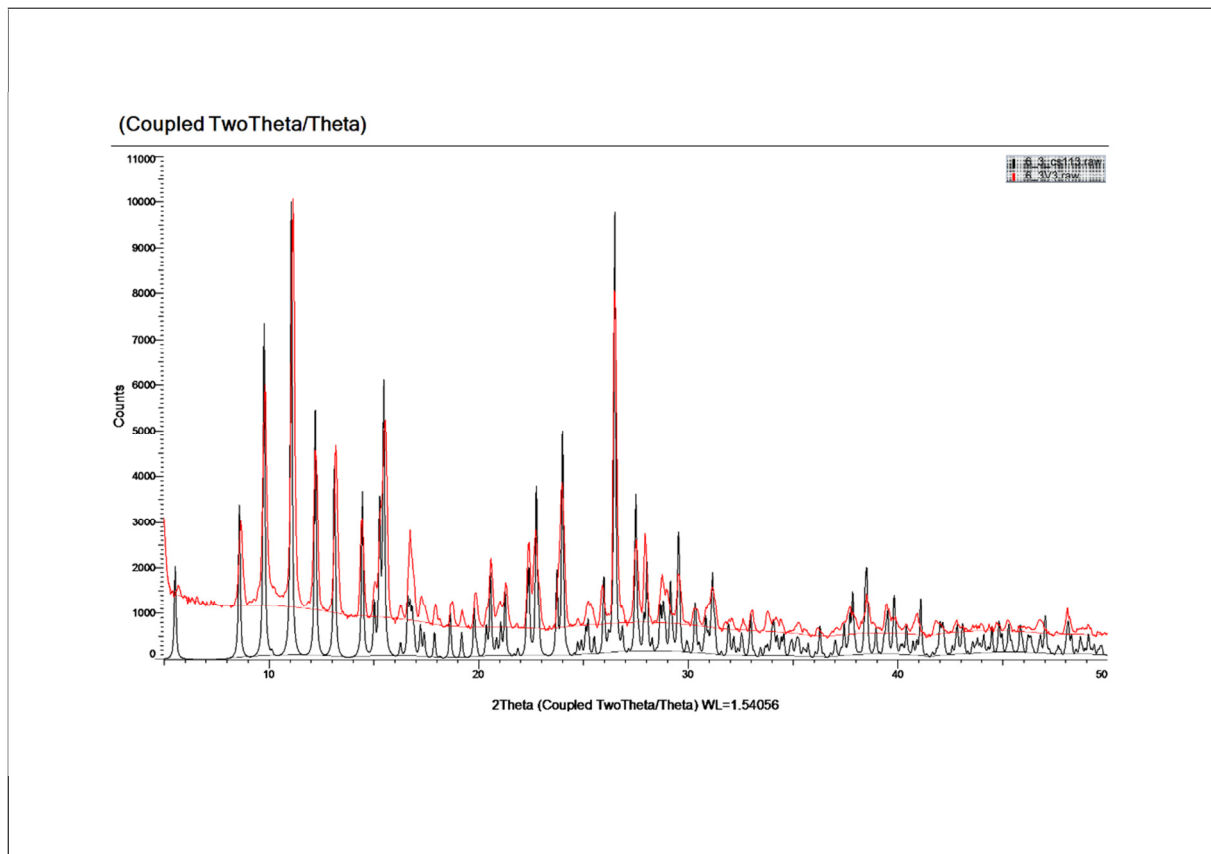

**Compound 4: [quin-H]<sub>2</sub>[CdBr<sub>4</sub>]·H<sub>2</sub>O**

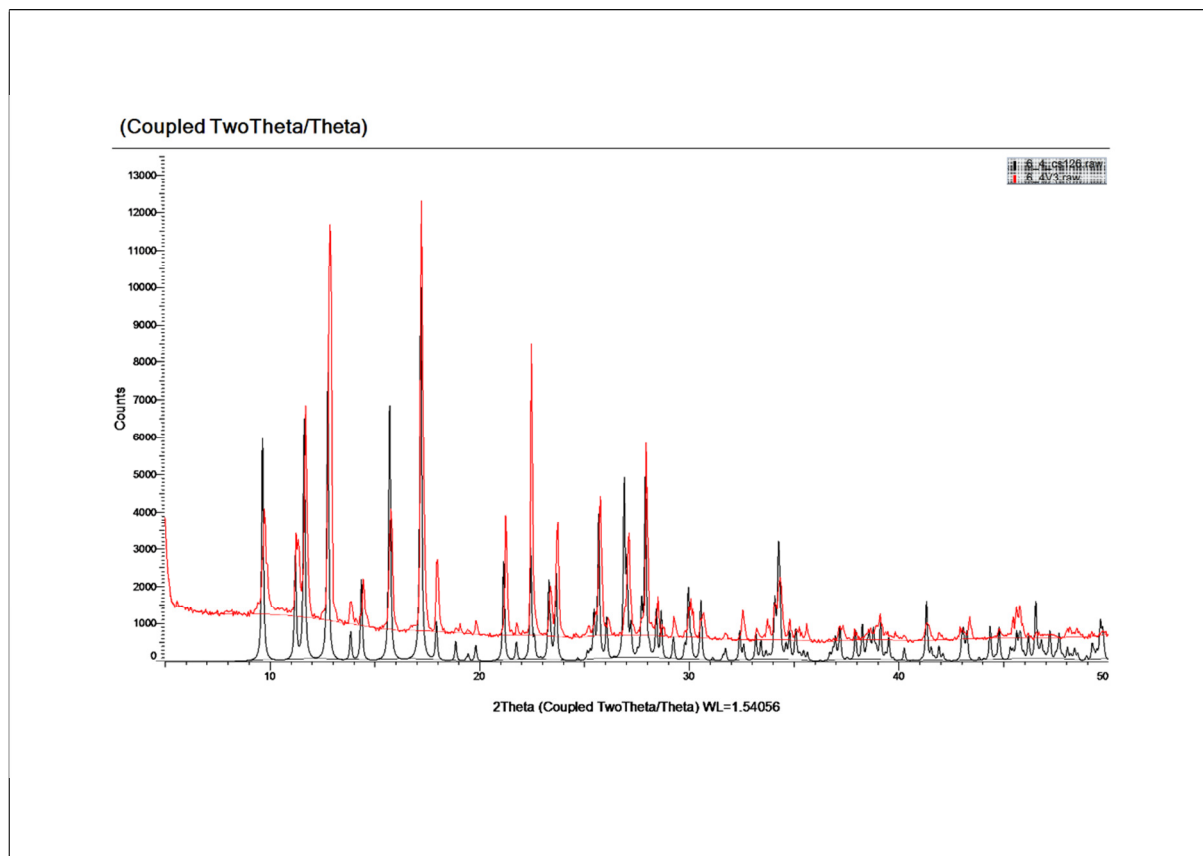

**Compound 5: [quin-H]<sub>2</sub>[HgCl<sub>4</sub>]·H<sub>2</sub>O**

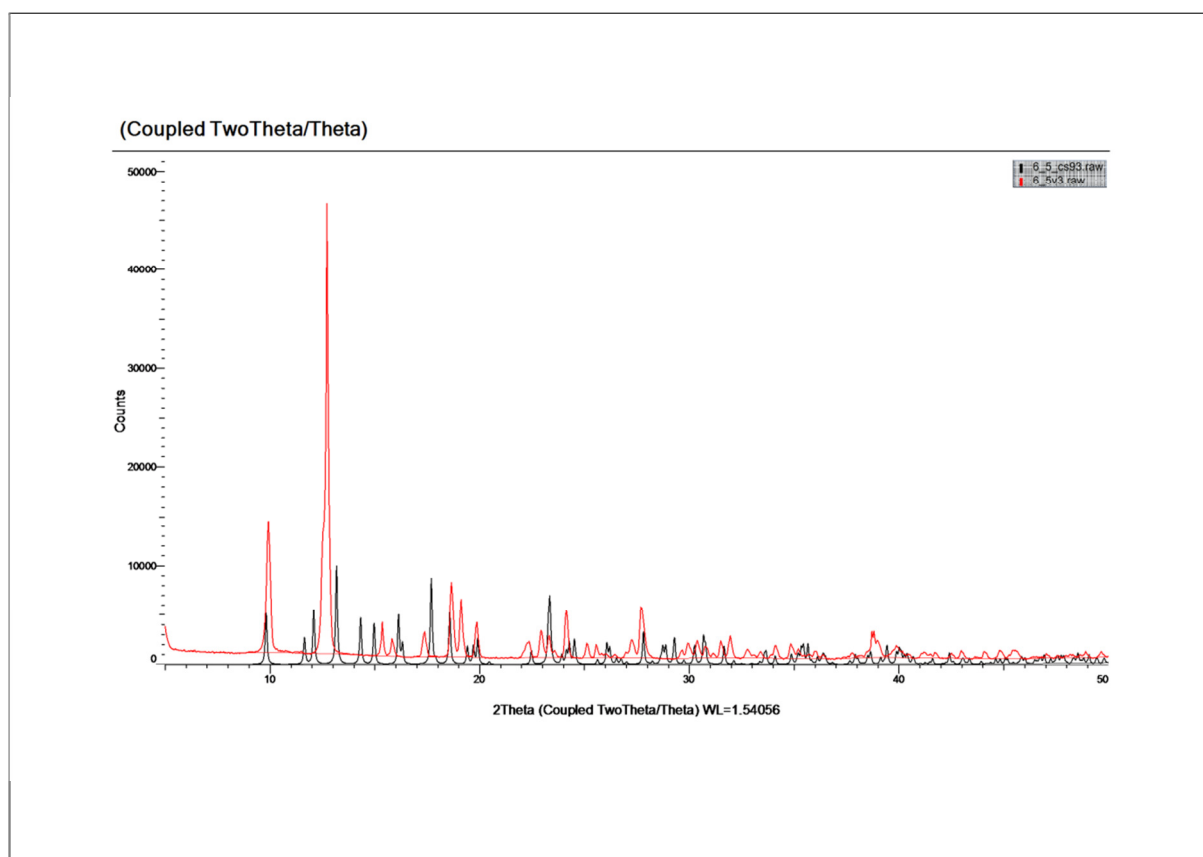

**Compound 6: [acr-H]<sub>2</sub>[ZnCl<sub>4</sub>]**

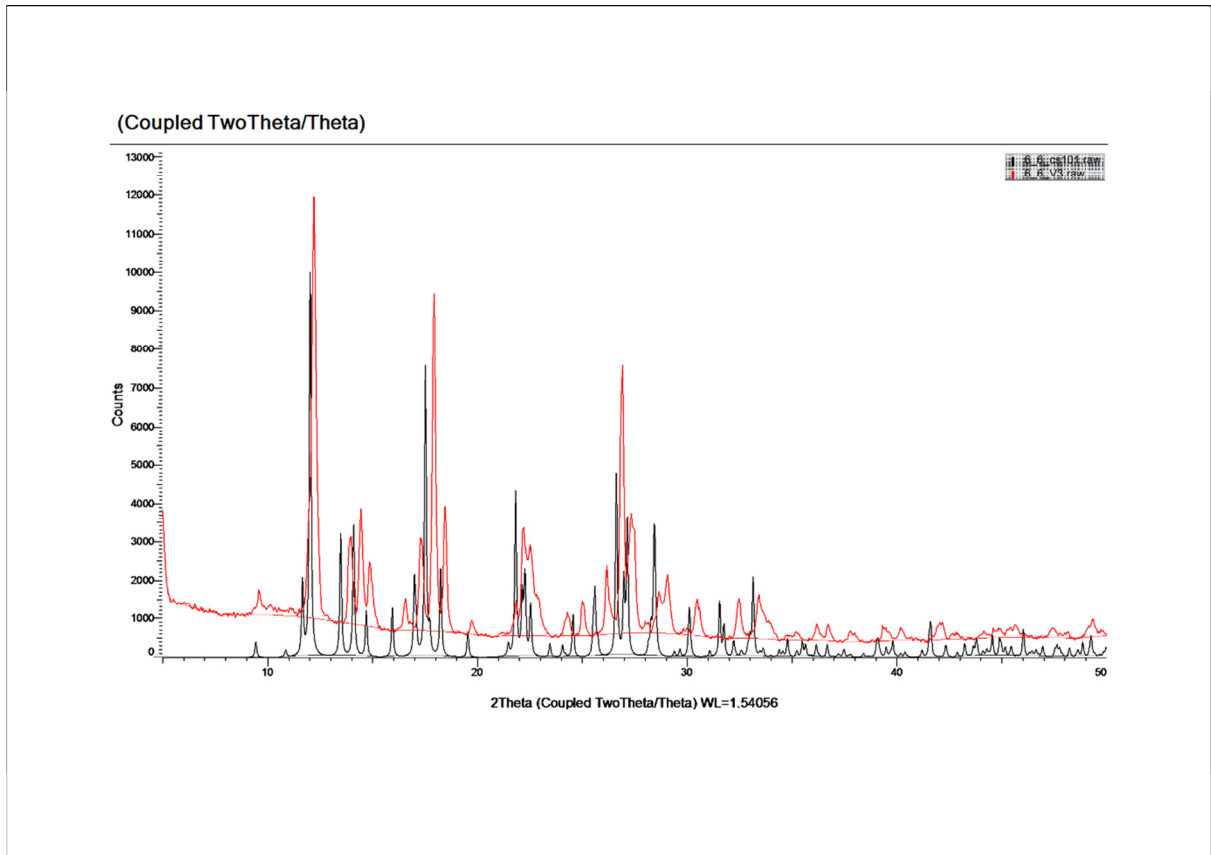

**Compound 7: [acr-H]<sub>2</sub>[ZnBr<sub>4</sub>]**

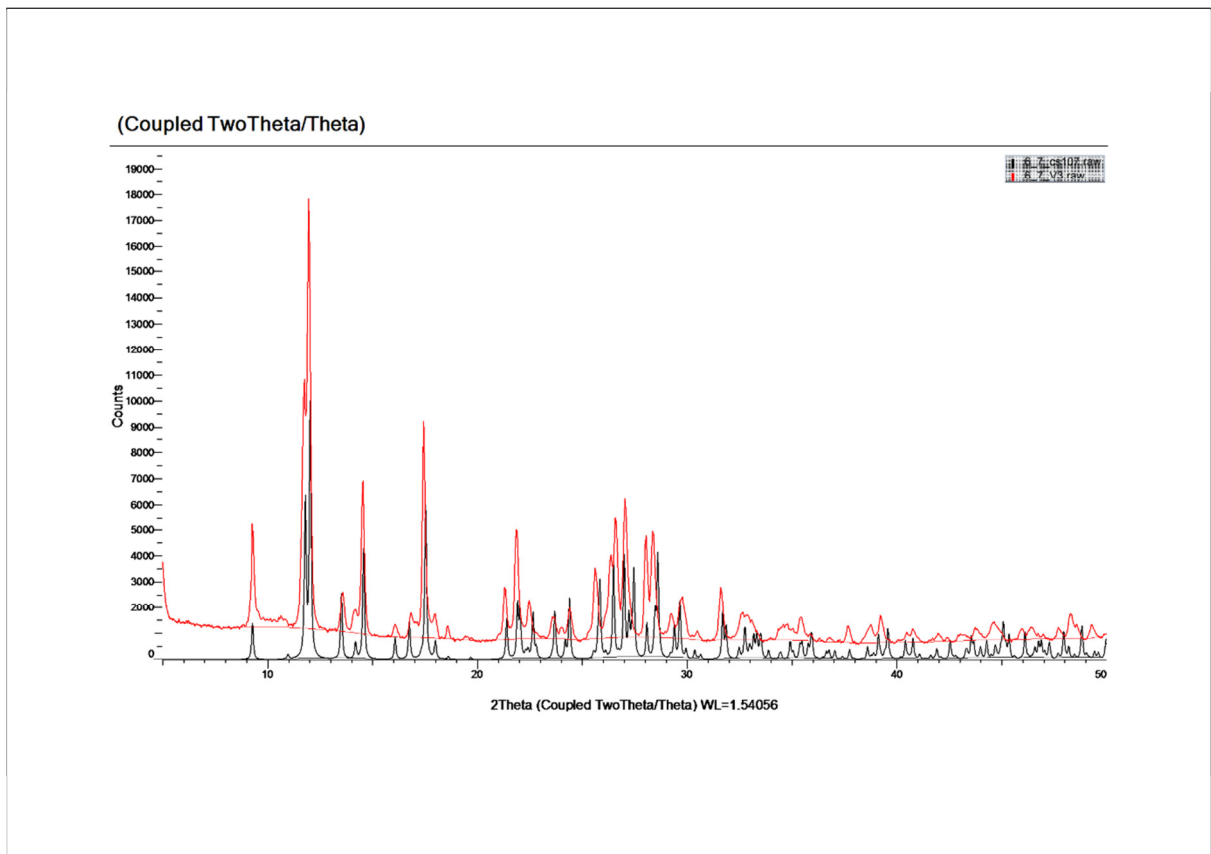

**Compound 8: [acr-H]<sub>2</sub>[CdCl<sub>4</sub>]**

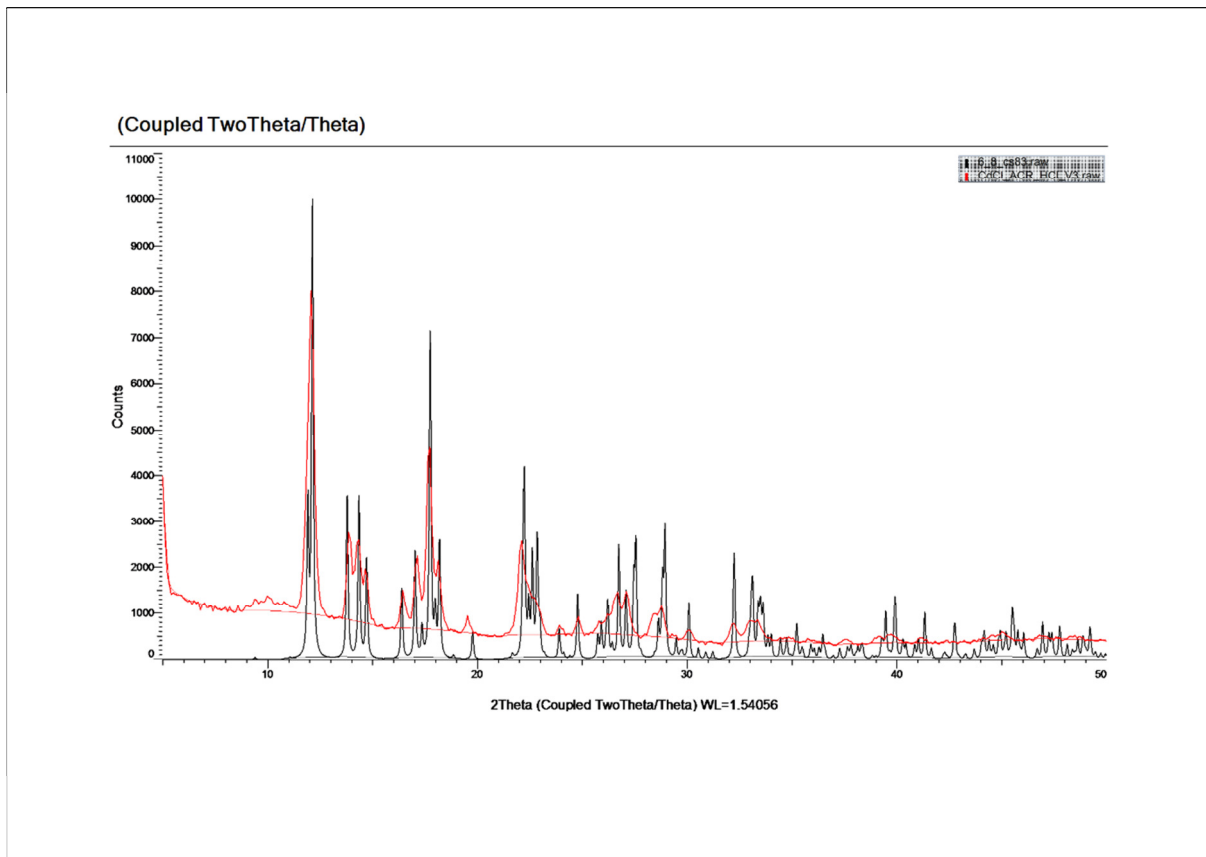

**Compound 9: [acr-H]<sub>2</sub>[CdBr<sub>4</sub>]**

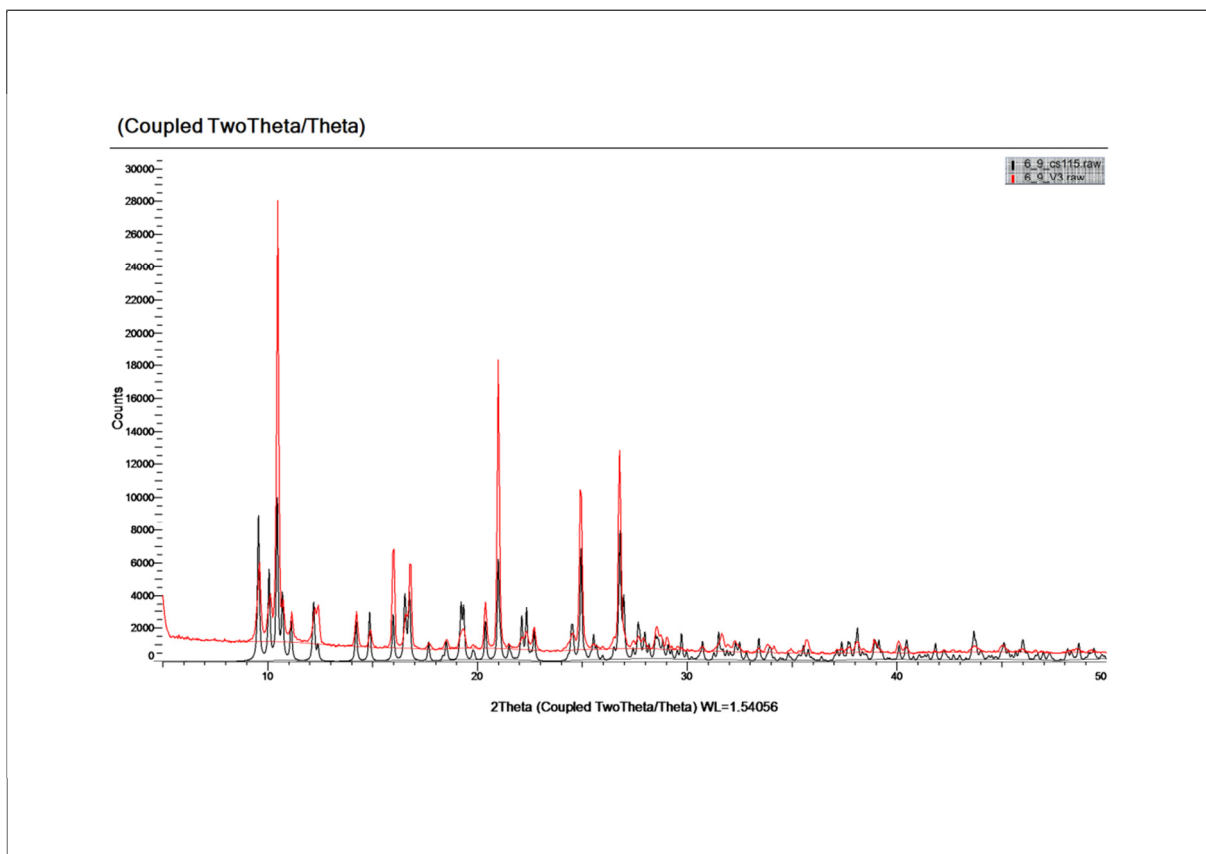

**Compound 10: [phe-H<sub>2</sub>]phe[ZnCl<sub>4</sub>]**

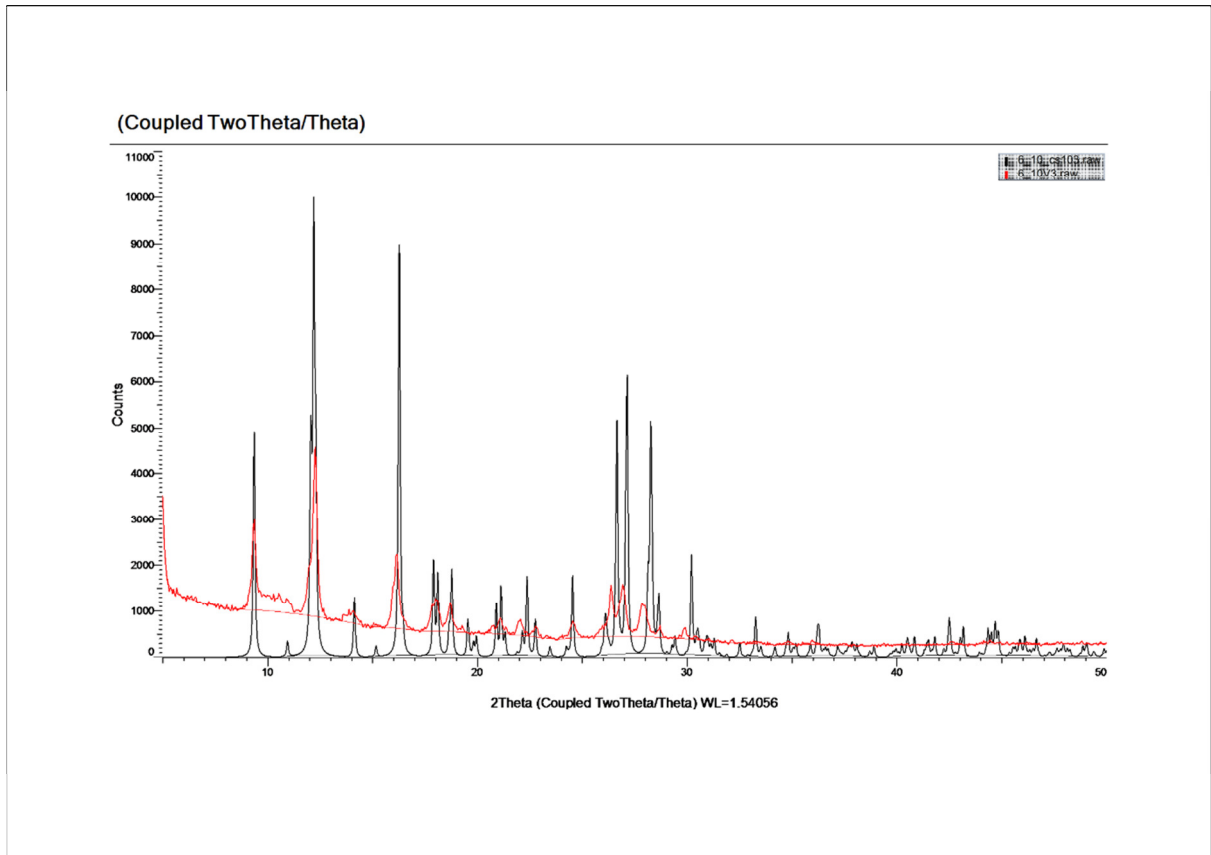

**Compound 11: [phe-H](phe)<sub>2</sub>[Zn(OH<sub>2</sub>)X<sub>3</sub>]·EtOH·H<sub>2</sub>O**

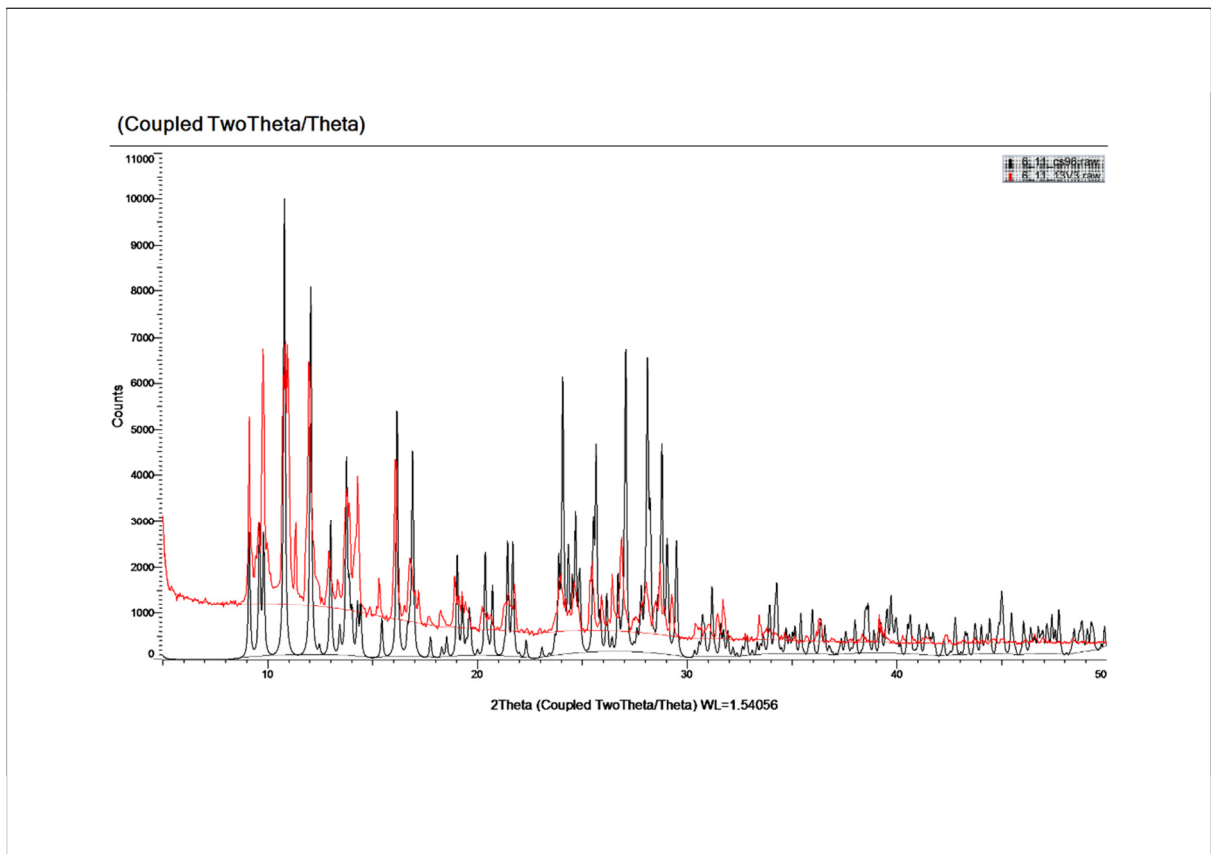

**Compound 12: (phe)<sub>2</sub>[Zn(OH<sub>2</sub>)<sub>2</sub>Cl<sub>2</sub>]·H<sub>2</sub>O**

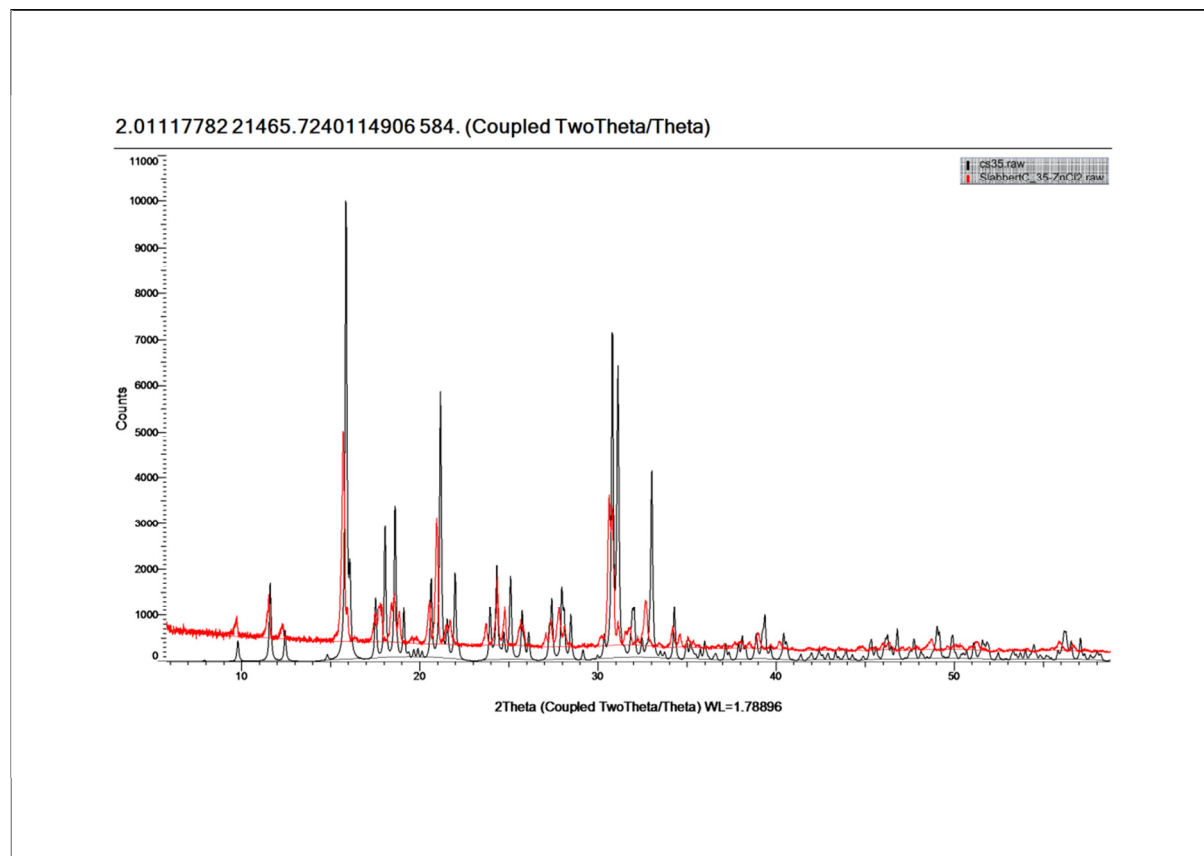

**Compound 13: (phe)<sub>2</sub>[Zn(OH<sub>2</sub>)<sub>2</sub>Br<sub>2</sub>]·H<sub>2</sub>O**

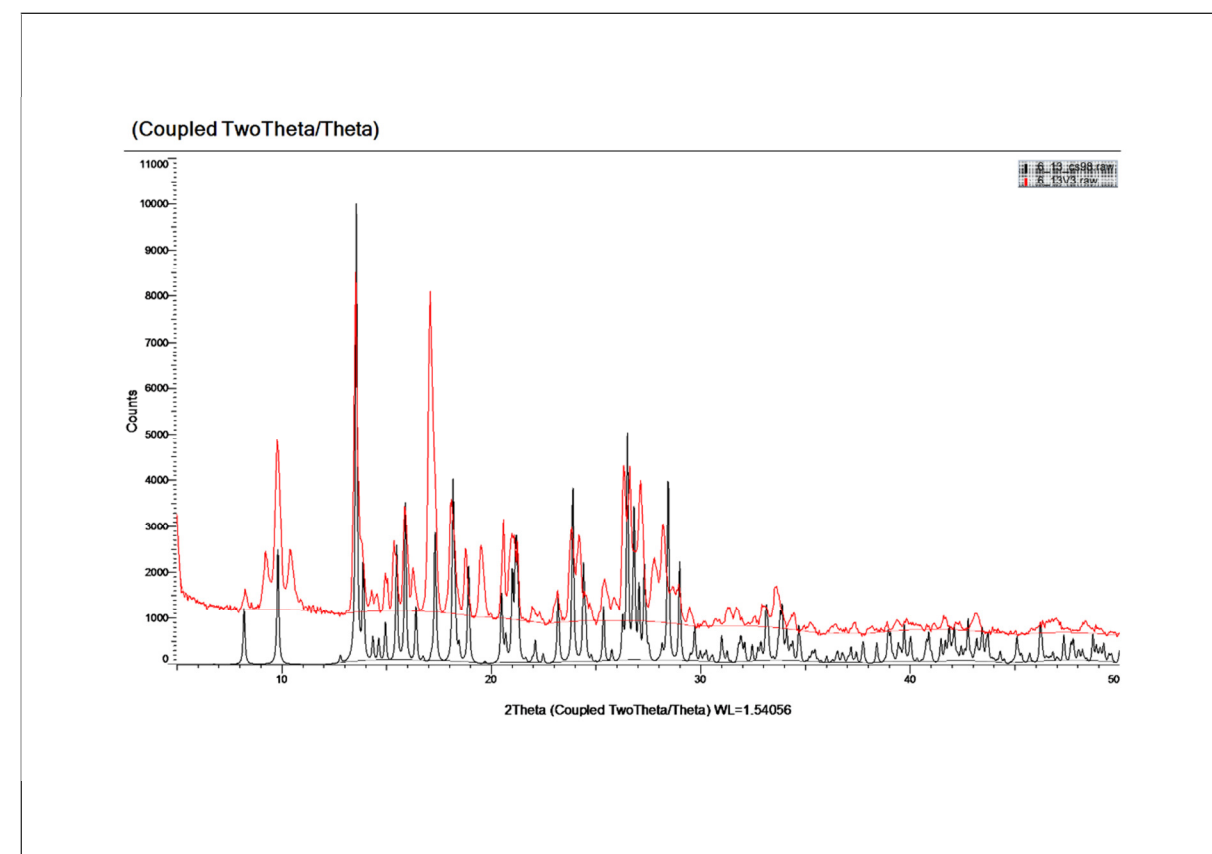

**Compound 14:  $(\text{acr})_3[\text{Zn}(\text{OH}_2)_2\text{Br}_2]\cdot\text{H}_2\text{O}$**

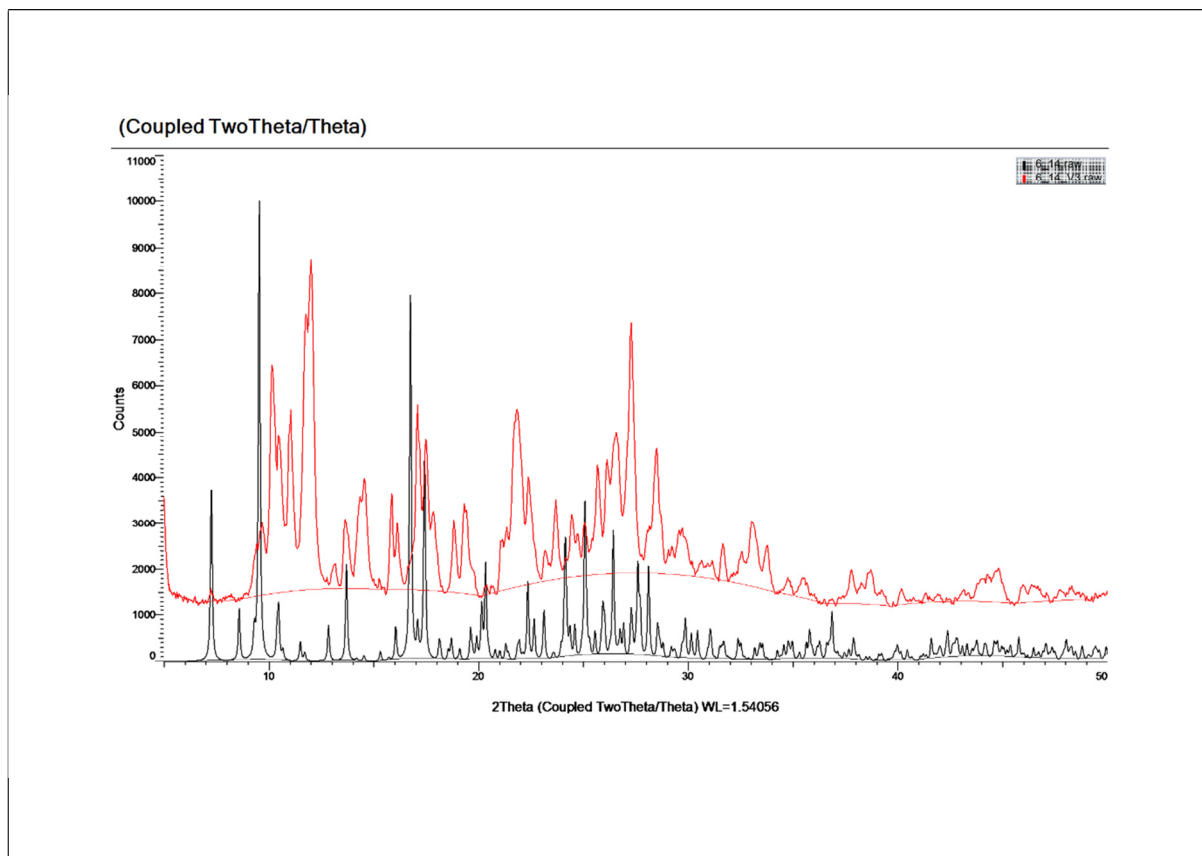

**Compound 15:  $(\text{acr})_2[\text{Zn}(\text{OH}_2)_2(\text{O}^i\text{-prop})]$**

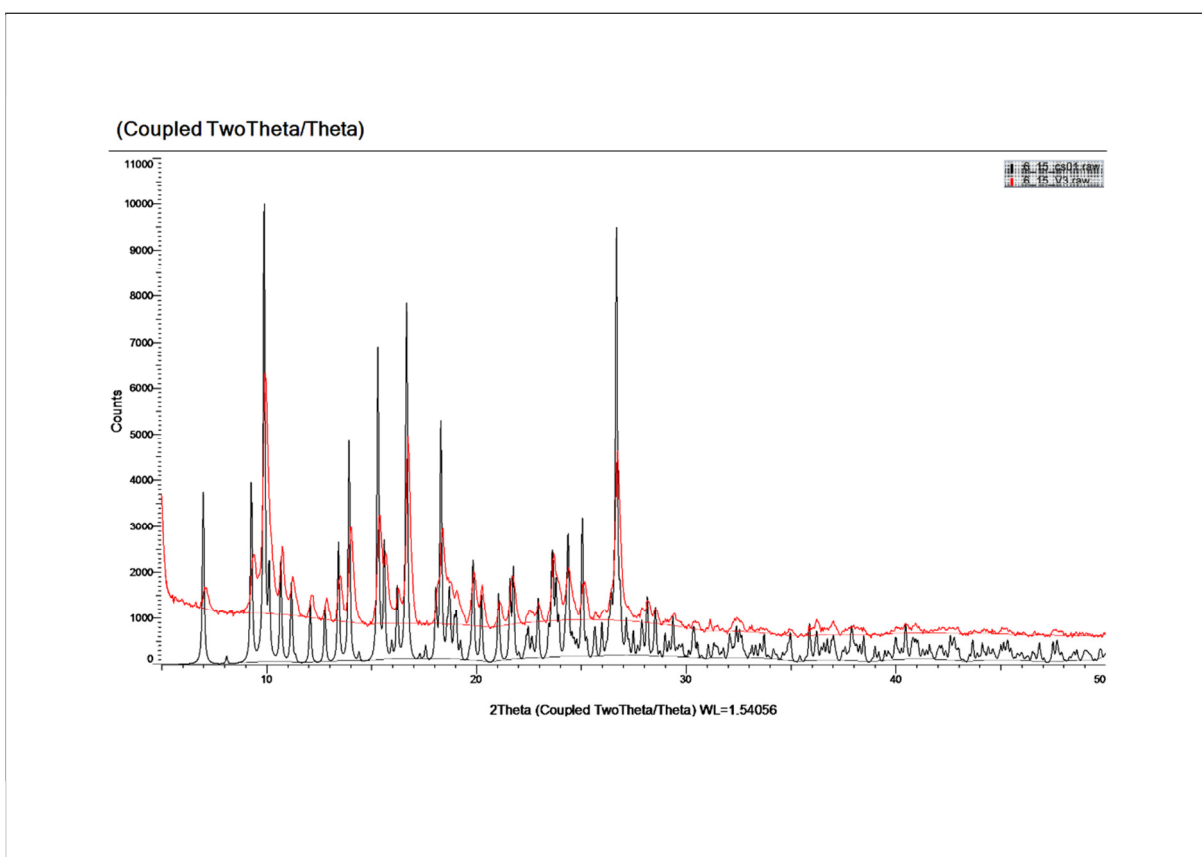



**Compound 16: (phe)<sub>2</sub>[Zn(OH<sub>2</sub>)I<sub>2</sub>(O-EtOH)]**

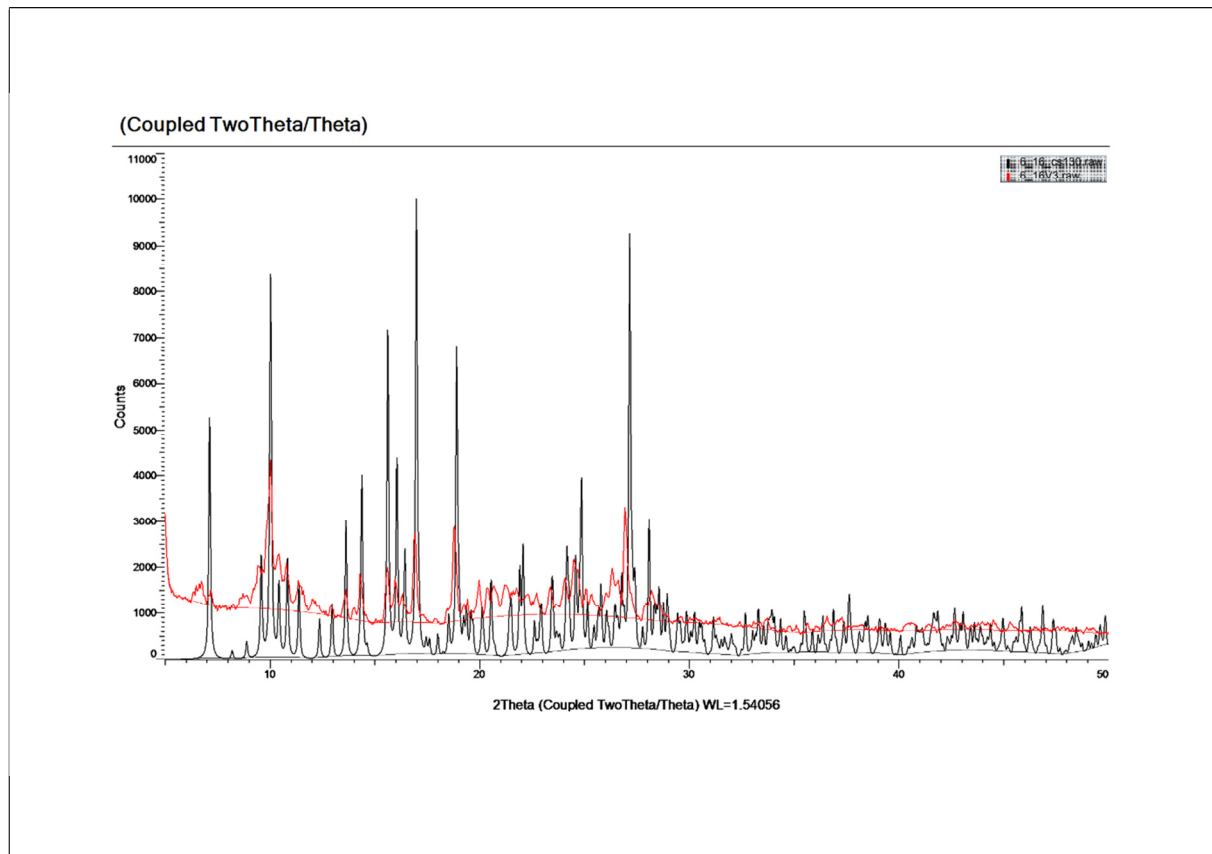

Supplement: c6ce00568c1.pdf [file c6ce00568c1.pdf]
